# Supplementary material for: Comparison of Outcomes before and after Ohio's Law Mandating Use of the FDA-Approved Protocol for Medication Abortion: A Retrospective Cohort Study
Source: PubMed Central journal article supplement (PMC5004901; doi:10.1371/journal.pmed.1002110), 2016-08-30
Supplement: pmed.1002110.s009.pdf [file pmed.1002110.s009.pdf]

# Ohio FDA Protocol for Medication Abortion Study

## Data Abstraction Manual

Version 1.0  
8/18/2014

## Table of Contents

|                                                                           |    |
|---------------------------------------------------------------------------|----|
| I. Study Contact Information .....                                        | 2  |
| II. General Study Information .....                                       | 3  |
| III. Communication Expectations .....                                     | 4  |
| IV. Data Abstraction Overview .....                                       | 4  |
| V. Data Abstraction Instructions .....                                    | 5  |
| VI. Quality Assurance .....                                               | 5  |
| Appendix A: Table of Data Elements with Data Entry Instructions .....     | 7  |
| Appendix B: FDA vs. Evidence-Based Protocol for Medication Abortion ..... | 27 |
| Appendix C: Visit Flowcharts .....                                        | 28 |
| Appendix D: Data Review Documentation Form .....                          | 29 |

## I. Study Contact Information

Site Number: \_\_\_\_\_

Site Name: \_\_\_\_\_

Data Abstractor Name: \_\_\_\_\_

Site Supervisor Name: \_\_\_\_\_

### Primary contact person at University of California, San Francisco (UCSF):

**Sarah Combellick, Project Director**

Office phone: (510) 986-8927

Mobile phone: [REDACTED]

Email: [combellicks@obgyn.ucsf.edu](mailto:combellicks@obgyn.ucsf.edu)

Office hours: Sarah is available Monday, Tuesday, and Thursday from 11am-7:30pm and Wednesday from 11am-3pm (Eastern Standard Time).

**You will have a telephone meeting with Sarah Combellick every**

\_\_\_\_\_ at \_\_\_\_\_ (Eastern Standard Time).  
(day of week) (time)

If you need to reach someone at UCSF on a Wednesday afternoon or Friday, or if Sarah is unavailable, contact:

**Elise Belusa, Project Coordinator**

Office phone: (510) 986-8969

Email: [belusae@obgyn.ucsf.edu](mailto:belusae@obgyn.ucsf.edu)

Back up contact person if Sarah and Elise are unavailable or if it is outside of UCSF work hours:

**Ushma Upadhyay, Principal Investigator**

Office phone: (510) 986-8946

Mobile phone: [REDACTED]

Email: [upadhyayu@obgyn.ucsf.edu](mailto:upadhyayu@obgyn.ucsf.edu)

## II. General Study Information

For this study, we aim to understand the effects of an Ohio law that went into effect in 2011, requiring medication abortions to be provided in accordance to a protocol approved by the U.S. Food and Drug Administration in 2000, compared to the previously used regimen (see **Appendix B** for a table comparing the regimens). We will compare the need for any additional intervention before and after the law was implemented.

This study will use data abstracted from all medical charts of patients receiving medication abortions at four Ohio facilities in both the pre-law and post-law periods: [REDACTED]

[REDACTED]. The exact date ranges for chart abstraction vary by site depending on a number of factors. The first day of the post-law period is the date that the site began providing medication abortion with the FDA protocol. The end dates for [REDACTED] are earlier than the other sites due to the changeover to electronic health records on March 1, 2014.

|                                            | [REDACTED]                                        | [REDACTED]                                       | [REDACTED]                         | [REDACTED]                          |
|--------------------------------------------|---------------------------------------------------|--------------------------------------------------|------------------------------------|-------------------------------------|
| <b>Study timeframe for pre-law Period</b>  | January 1 <sup>st</sup> , 2010 – January 31, 2011 |                                                  |                                    |                                     |
| <b>Study timeframe for post-law Period</b> | June 1 <sup>st</sup> , 2011 – February 28, 2014   | March 1 <sup>st</sup> , 2011 – February 28, 2014 | January 15, 2013 – August 31, 2014 | February 23, 2011 – August 31, 2014 |

Information from a total of approximately 5,000 patient charts will be abstracted. We anticipate that data collection will take place between August and December, 2014. The methods for this study have been approved by the UCSF Committee on Human Research.

### III. Communication Expectations

As you begin collecting data, communicate regularly with your site supervisor and the UCSF contact about ANY questions you have about data collection. It is nearly always better to ask than to assume or guess. This helps ensure that data is collected accurately and consistently across study sites. You will never be penalized for asking too many questions.

Please also talk to us about any questions, concerns or suggestions you have about how our procedures might be improved. Please mention if the timeline for the project seems unreasonable, based on your experiences in the beginning, so that we can re-adjust our expectations and address questions related to budgeting, scheduling, etc. as they arise.

### IV. Data Abstraction Overview

- When abstracting and entering data from medical records, it is extremely important to pay careful attention to detail.
  - Be aware of the data abstraction field requirements and complete all fields.
  - Enter data exactly as it is written in the chart, even if you think the chart has an error. If the error in the chart makes it impossible to complete a field (e.g., only 4 digits of a zip code is listed), choose “Not in chart” and then record the data with an explanation in the comments field at the end of the section.
  - Add comments in the final field of each section if you want to communicate something about the form (e.g., lots of missing data, illegible writing, possible error in chart).
  - Take short regular breaks to rest your eyes, stretch and take care of your physical health needs. This helps avoid burnout and data collection errors.
  - If you have any questions, ask!
- For the study, we are recording data in a HIPAA-compliant, web-based database called Qualtrics. You can access the database from any device that is connected to the internet (desktop or laptop computer, iPad). You will be given a study iPad with a keyboard attachment (details in **Section V** below).
- Please give us any feedback about the database early on in the process. UCSF can edit the database during the initial phase of data collection.
- Keep the study iPad safe and secure, as best you can. Do not leave it in plain view when unattended. At the end of each day, **lock the iPad** in a locked office, filing cabinet, or safe. Do not bring the iPad or keyboard attachment off the premises.

## V. Data Abstraction Instructions

1. First, affix a green, numbered sticker to the front of every paper chart before entering it into the Qualtrics Database. This 6 digit number will become the patient's Case ID Number. The 1<sup>st</sup> field in the database requires entering this number. **It is very important that this number is entered accurately**, as it is the link between the physical chart and the information in the database.
2. Then, check to see if the patient had more than one medication abortion during the study period. If they had more than one, only abstract information from the first medication abortion. Make a note in the comments text box of the first section that states: *"Patient had subsequent medication abortion(s) on mm/dd/yyyy"*.
3. Begin entering the required data into the Qualtrics database.
  - **Entering data on a laptop or desktop computer:** Make sure your computer is connected to the internet. Open your web browser and enter the link to the Qualtrics database (to be provided at training). It is a good idea to bookmark this link in your web browser since you will be accessing it on a regular basis.
  - **Entering data on the study iPad (with Wi-Fi):** Turn on and unlock the iPad using the passcode (to be provided at training). Make sure the iPad is connected to the clinic Wi-Fi. Find the **"Live Survey – OH MAB"** icon located on the iPad home screen. Click the icon and a blank version of the database will pop up. For each chart, you will click on the icon, so remember to **SUBMIT** the form when you have finished inputting one chart, and close the Safari window, before moving on to the next chart.
4. Enter **all** relevant information from the abortion into the Qualtrics Database using the computer or iPad (**Important: Refer to Appendix A for question-by-question data entry instructions**).
5. The database will automatically skip you to different sets of questions depending on whether the case is from the pre or post-law period.

## VI. Quality Assurance

Quality assurance is an extremely important aspect of data entry. We would like each data abstractor to use the ***Data Review Documentation Form (Appendix D)*** to compare the data in the database to the data in the actual medical chart on a regular basis. Each sheet of green stickers has one randomly selected sticker with a black dot on it. For each chart with a black-dotted sticker, please do the following:

After data from the black-dotted chart has been entered, but **before submitting the record**, go back to the beginning of the database and compare the data with the original information in the medical chart. Any errors should be corrected in the database and a record should be kept of all errors by question number, using the ***Data Review Documentation Form***. For each error found, repeat the data checking process for the next two consecutive charts and record in the ***Data Review Documentation Form***. This will bring our collective attention to tricky aspects of the data collection process and the database. If there are no or few errors noted after the 200<sup>th</sup> chart, data checks can occur for every THREE (3) sheets of stickers.

Data collection can be tiring and the process can be imperfect. We expect that there will be some error in the data entry—there always is. Our goal is to minimize the number of errors so that the data analysis is as accurate as possible. Routine data monitoring is a normal aspect of research and is not meant to be punitive. It can be very helpful to refine the data collection tools and processes. In addition, being able to report that we took such measures strengthens the credibility of the study in the eyes of the research audience.

## Appendix A: Table of Data Elements with Data Entry Instructions

| Data Element                      | Response Choices                                 | Select only one/Select all that apply | Data Abstraction Instructions                                                                                                                                      |
|-----------------------------------|--------------------------------------------------|---------------------------------------|--------------------------------------------------------------------------------------------------------------------------------------------------------------------|
| <b>Abstraction Information</b>    |                                                  | <b>Required Section</b>               |                                                                                                                                                                    |
| 0. CASE ID                        | [Numeric field]                                  |                                       | <b>Must be 6 digits</b>                                                                                                                                            |
| 1. Site of service                | ██████████<br>██████████<br>██████████<br>██████ | Select only one                       | If ██████████, skip to 3. If ████████, continue to 2.                                                                                                              |
| 2. Chart Number                   | [Numeric field]                                  |                                       | Positive, whole numbers<br><b>Note: This field is for ████████ only.</b>                                                                                           |
| 3. Date of abstraction            | MM/DD/YYYY                                       |                                       | Enter today's date<br>Must be: 8/18/2014 or later                                                                                                                  |
| 4. Abstractor's name              | [Text field]                                     |                                       | Enter your name                                                                                                                                                    |
| <b>Patient Socio-Demographics</b> |                                                  | <b>Required Section</b>               |                                                                                                                                                                    |
| 5. Date of birth                  | MM/DD/YYYY<br>Not in chart                       |                                       | Format for date<br>Must be: 1/1/1964-12/31/2004<br><br><b>Note: All data elements with response choices are required. For missing data, select "Not in chart".</b> |
| 6. Patient zip code               | [Numeric field]<br>Not in chart                  | Select only one                       | Limit to 5 digit zip code                                                                                                                                          |



| Data Element                | Response Choices                                                                                                                                                                                          | Select only one/Select all that apply | Data Abstraction Instructions                                                                                              |
|-----------------------------|-----------------------------------------------------------------------------------------------------------------------------------------------------------------------------------------------------------|---------------------------------------|----------------------------------------------------------------------------------------------------------------------------|
| 7. Insurance status         | Private insurance<br>Medicaid<br>Medicare<br>Other<br>None<br>Not in chart                                                                                                                                | Select all that apply                 | <b>Note: Record patient insurance status if documented. Do not mark how they paid for their abortion.</b>                  |
| 8. Latina/Hispanic          | Hispanic<br>Non-Hispanic<br>Not in chart                                                                                                                                                                  | Select only one                       |                                                                                                                            |
| 9. Race                     | White/Caucasian<br>Black/African American<br>Asian<br>American Indian/Alaskan<br>Pacific Islander<br>Multi/Bi-Racial<br>Other<br>Not in chart                                                             | Select all that apply                 |                                                                                                                            |
| 10. Highest grade completed | 8 <sup>th</sup> grade or less<br>9 <sup>th</sup> -12 <sup>th</sup> grade/No diploma<br>High School Diploma or GED<br>Associates/Some college<br>Bachelor's degree<br>Post Graduate degree<br>Not in chart | Select only one                       |                                                                                                                            |
| 11. Height                  | _____ ft _____ inches<br>Not in chart                                                                                                                                                                     | Select only one                       | Whole numbers                                                                                                              |
| 12. Weight                  | _____ lbs<br>_____ kilos<br>Not in chart                                                                                                                                                                  | Select only one                       | Whole numbers<br><b>Note: Record patient weight as documented. If both pounds and kilos are in the chart, record both.</b> |
| 13. Body Mass Index (BMI)   | _____<br>Not in chart                                                                                                                                                                                     | Select only one                       | Whole numbers                                                                                                              |

| Data Element                               | Response Choices      | Select only one/Select all that apply | Data Abstraction Instructions                                                                                                                                                           |
|--------------------------------------------|-----------------------|---------------------------------------|-----------------------------------------------------------------------------------------------------------------------------------------------------------------------------------------|
| 14. Number of previous pregnancies         | _____<br>Not in chart | Select only one                       | Whole numbers<br><br>[if "0" skip to 18]<br><br><b>Note: Record patient pregnancy history as documented in the chart even if the birth outcomes do not add up to total pregnancies.</b> |
| 15. Number of previous miscarriages        | _____<br>Not in chart | Select only one                       | Whole numbers                                                                                                                                                                           |
| 16. Number of previous induced abortions   | _____<br>Not in chart | Select only one                       | Whole numbers                                                                                                                                                                           |
| 17. Number of previous births              | _____<br>Not in chart | Select only one                       | Whole numbers                                                                                                                                                                           |
| a. Number of C-sections                    | _____<br>Not in chart | Select only one                       | Whole numbers                                                                                                                                                                           |
| b. Number of vaginal births                | _____<br>Not in chart | Select only one                       | Whole numbers                                                                                                                                                                           |
| 18. General notes about socio-demographics | [Text field]          |                                       |                                                                                                                                                                                         |
|                                            |                       |                                       |                                                                                                                                                                                         |

| Data Element                                                            | Response Choices                                       | Select only one/Select all that apply | Data Abstraction Instructions                                                                                                                                                                                                                                                                                                                                                                                                                                                                                                                                                                    |
|-------------------------------------------------------------------------|--------------------------------------------------------|---------------------------------------|--------------------------------------------------------------------------------------------------------------------------------------------------------------------------------------------------------------------------------------------------------------------------------------------------------------------------------------------------------------------------------------------------------------------------------------------------------------------------------------------------------------------------------------------------------------------------------------------------|
| <b>First Consent visit</b>                                              |                                                        |                                       | <b>Required Section</b>                                                                                                                                                                                                                                                                                                                                                                                                                                                                                                                                                                          |
| 19. Date of first visit                                                 | MM/DD/YYYY<br>Not in chart                             |                                       | Format for date                                                                                                                                                                                                                                                                                                                                                                                                                                                                                                                                                                                  |
| 20. Gestational age                                                     |                                                        |                                       |                                                                                                                                                                                                                                                                                                                                                                                                                                                                                                                                                                                                  |
| a. Clinical estimate of gestation at consent visit (weeks) – LMP        | (__ __ weeks and __ days)<br>(__ days)<br>Not in chart | Select only one                       | <p>Positive, whole numbers</p> <p>If both 20a and 20b are greater than 7 weeks, 0 days <u>or</u> 49 days <u>or</u> not in chart at consent visit, you can stop entering data after Question 20. Close the browser window and start abstracting the next chart.</p> <p><b>Note: Some sites calculate gestational age by Last Menstrual Period (LMP), other sites calculate gestational age by ultrasound, and some use both and calculate a Final gestational age. Complete 20a through 20c based on standard practice at your site. Complete as many fields as there are data available.</b></p> |
| b. Clinical estimate of gestation at consent visit (weeks) – ULTRASOUND | (__ __ weeks and __ days)<br>(__ days)<br>Not in chart | Select only one                       | Positive, whole numbers                                                                                                                                                                                                                                                                                                                                                                                                                                                                                                                                                                          |
| c. Clinical estimate of gestation at consent visit (weeks) – FINAL      | (__ __ weeks and __ days)<br>(__ days)<br>Not in chart | Select only one                       | <p>Positive, whole numbers</p> <p><b>Note: “FINAL” is a field mainly used at</b><br/>██████</p>                                                                                                                                                                                                                                                                                                                                                                                                                                                                                                  |

| Data Element                          | Response Choices                                                              | Select only one/Select all that apply | Data Abstraction Instructions |
|---------------------------------------|-------------------------------------------------------------------------------|---------------------------------------|-------------------------------|
| d. Notes about gestational age        | [Text field]                                                                  |                                       |                               |
| 21. Serum hCG level                   | _____ hCG level<br>Test done but level not available in chart<br>Not in chart | Select only one                       | Positive, whole numbers       |
| 22. a. Urine pregnancy test result    | Positive<br>Negative<br>Test done but results not in chart<br>Not in chart    | Select only one                       |                               |
| b. Sensitivity of test                | High<br>Low<br>Not in chart                                                   | Select only one                       |                               |
| 23. General notes about consent visit | [Text field]                                                                  |                                       |                               |
| <b>Mifepristone Visit</b>             |                                                                               |                                       |                               |

**Mifepristone Visit**

|                                                                       |                                           |                 |                         |
|-----------------------------------------------------------------------|-------------------------------------------|-----------------|-------------------------|
| 24. Gestational age                                                   |                                           |                 |                         |
| a. Clinical estimate of gestation at mifepristone visit (weeks) – LMP | (__ __ weeks and __ days)<br>Not in chart | Select only one | Positive, whole numbers |

If both 24a and 24b are greater than 7 weeks, 0 days or 49 days or not in chart at consent visit, you can stop entering data after Question 24. Close the browser window and start abstracting the next chart.

**Note: Some sites calculate gestational age by Last Menstrual Period (LMP), other sites calculate gestational age by ultrasound, and some use both and calculate a Final**

| Data Element                                                                                                                                                                                      | Response Choices                                                                                               | Select only one/Select all that apply  | Data Abstraction Instructions                                                                                                                                                                                                                                                                                                                  |
|---------------------------------------------------------------------------------------------------------------------------------------------------------------------------------------------------|----------------------------------------------------------------------------------------------------------------|----------------------------------------|------------------------------------------------------------------------------------------------------------------------------------------------------------------------------------------------------------------------------------------------------------------------------------------------------------------------------------------------|
| b. Clinical estimate of gestation at mifepristone visit (weeks) – ULTRASOUND<br><br>c. Clinical estimate of gestation at mifepristone visit (weeks) – FINAL<br><br>d. Notes about gestational age | (__ __ weeks and __ days)<br>Not in chart<br><br>(__ __ weeks and __ days)<br>Not in chart<br><br>[Text field] | Select only one<br><br>Select only one | gestational age. Complete 20a through 20c based on standard practice at your site. Complete as many fields as there are data available.<br>Positive, whole numbers<br><br>Positive, whole numbers<br><br><b>Note: “FINAL” is a field mainly used at</b><br> |
| 25. Serum hCG level                                                                                                                                                                               | _____ hCG level<br>Test done but level not available in chart<br>Not in chart                                  | Select only one                        | Positive, whole numbers                                                                                                                                                                                                                                                                                                                        |
| 26. Urine pregnancy test result                                                                                                                                                                   | Positive<br>Negative<br>Test done but results Not in chart<br>Not in chart                                     | Select only one                        |                                                                                                                                                                                                                                                                                                                                                |
| a. Sensitivity of test                                                                                                                                                                            | High<br>Low<br>Not in chart                                                                                    | Select only one                        |                                                                                                                                                                                                                                                                                                                                                |

| Data Element                                                                                                                                                   | Response Choices                                                                                                                                                                                                                                                                                                                                      | Select only one/Select all that apply | Data Abstraction Instructions                                                                    |
|----------------------------------------------------------------------------------------------------------------------------------------------------------------|-------------------------------------------------------------------------------------------------------------------------------------------------------------------------------------------------------------------------------------------------------------------------------------------------------------------------------------------------------|---------------------------------------|--------------------------------------------------------------------------------------------------|
| 27. Date of mifepristone administration                                                                                                                        | MM/DD/YYYY<br>Not in chart                                                                                                                                                                                                                                                                                                                            | Select only one                       | Format for date                                                                                  |
| a. Time of mifepristone administration                                                                                                                         | __:__(am/pm)<br>Time not indicated in chart                                                                                                                                                                                                                                                                                                           | Select only one                       | Format for time                                                                                  |
| 28. Mifepristone dose                                                                                                                                          | 200 mg<br>600 mg (FDA Protocol)<br>Other (specify) [Text field]<br>Not in chart                                                                                                                                                                                                                                                                       | Select only one                       | Limit to positive, whole numbers                                                                 |
| 29. Other medications ordered, dispensed or administered (Include pain meds, antibiotics and other meds. Do not include contraception. Select all that apply.) | A. Acetaminophen<br>B. Advil<br>C. Amoxicillin<br>D. Azithromycin<br>E. Diazepam<br>F. Doxycycline<br>G. Hydrocodone & Acetaminophen<br>H. Ibuprofen<br>I. Methergine<br>J. Methylergometrine<br>K. MICRhoGam<br>L. Motrin<br>M. Ondansetron<br>N. Phenergan<br>O. Promethazine<br>P. Tylenol<br>Q. Valium<br>R. Vicodin<br>S. Zithromax<br>T. Zofran | Select all that apply                 | <b>Note: Include pain meds, antibiotics and other medications. Do not include contraception.</b> |

| Data Element                                       | Response Choices                                                             | Select only one/Select all that apply | Data Abstraction Instructions                                                                                                                                                                         |
|----------------------------------------------------|------------------------------------------------------------------------------|---------------------------------------|-------------------------------------------------------------------------------------------------------------------------------------------------------------------------------------------------------|
|                                                    | U. Other (specify) [Text field]<br>V. Not in chart                           |                                       |                                                                                                                                                                                                       |
| 30. General notes about Mifepristone visit         | [Text field]                                                                 |                                       | <b>Note here if additional dose of mifepristone was required at this visit and explain.</b>                                                                                                           |
| <b>Misoprostol Administration (Pre law change)</b> |                                                                              |                                       |                                                                                                                                                                                                       |
| Did abortion occur in Pre or Post law period?      | Pre-law<br>Post-law                                                          | Select only one                       | <b>Note: One option must be selected. If abortion was started 1/1/2010 – 1/31/2011, select Pre-law. If abortion was started 2/1/2011 or later, select Post-law.</b><br><br>If “Post-law”, skip to 36. |
| 31. Did expulsion occur after mifepristone alone?  | Yes (explain how expulsion was confirmed) [Text field]<br>No<br>Not in chart | Select only one                       | <b>Note: Information for this section will usually appear on the form for the first follow up visit.</b>                                                                                              |
| 32. Date of misoprostol administration             | MM/DD/YYYY<br>Not in chart                                                   | Select only one                       | Format for date                                                                                                                                                                                       |
| 33. Time of misoprostol administration             | __:__(am/pm)<br>Time not indicated                                           | Select only one                       | Format for time                                                                                                                                                                                       |
| 34. Method of administration                       | Oral<br>buccal<br>vaginal<br>other (explain) [Text field]<br>Not in chart    | Select only one                       | <b>Note: Enter method of administration reported by patient if available.</b>                                                                                                                         |

| Data Element                                       | Response Choices                                                             | Select only one/Select all that apply | Data Abstraction Instructions                                                                                                                                        |
|----------------------------------------------------|------------------------------------------------------------------------------|---------------------------------------|----------------------------------------------------------------------------------------------------------------------------------------------------------------------|
| 35. General notes about Misoprostol administration | [Text field]                                                                 |                                       |                                                                                                                                                                      |
| <b>Misoprostol Visit (Post law change)</b>         |                                                                              |                                       |                                                                                                                                                                      |
| 36. Did expulsion occur after mifepristone alone?  | Yes (explain how expulsion was confirmed) [Text field]<br>No<br>Not in chart | Select only one                       |                                                                                                                                                                      |
| 37. Date of misoprostol administration             | MM/DD/YYYY<br>Not in chart                                                   | Select only one                       | Format for date                                                                                                                                                      |
| 38. Time of misoprostol administration             | __:__(am/pm)<br>Time not indicated                                           | Select only one                       | Format for time                                                                                                                                                      |
| 39. Bleeding since last visit:                     |                                                                              |                                       | <p>██████████</p> <p>██████████: complete 39a and, if available, 39b.</p> <p>██████████: complete 38b only.</p>                                                      |
| a. Amount of bleeding?                             | None<br>Minimal<br>Moderate<br>Heavy/Excessive<br>Not in chart               | Select only one                       | <p><b>Important:</b> Where there is no check box for “None”, mark “Not in chart”.</p> <p>Mark “Heavy” or “Excessive” depending on terminology used at your site.</p> |
| b. Notes                                           | [Text field]                                                                 |                                       |                                                                                                                                                                      |
| 40. Cramping since last visit:                     |                                                                              |                                       | <p>██████████: complete 40a and, if appropriate, 40b.</p> <p>██████████: complete 40b only.</p>                                                                      |



| Data Element                                                    | Response Choices                                                                                                                                           | Select only one/Select all that apply | Data Abstraction Instructions                                                                                                                                                                                                                            |
|-----------------------------------------------------------------|------------------------------------------------------------------------------------------------------------------------------------------------------------|---------------------------------------|----------------------------------------------------------------------------------------------------------------------------------------------------------------------------------------------------------------------------------------------------------|
| a. Amount of cramping?                                          | None<br>Minimal<br>Tolerable<br>Unbearable<br>Not in chart                                                                                                 | Select only one                       | <b>Important:</b> Where there is no check box for “None”, mark “Not in chart”.                                                                                                                                                                           |
| b. Notes                                                        | [Text field]                                                                                                                                               |                                       |                                                                                                                                                                                                                                                          |
| 41. Other side effects or symptoms experienced since last visit | A. Nausea<br>B. Vomiting<br>C. Diarrhea<br>D. Vasovagal response / Fainting<br>E. Fever<br>F. Chills<br>G. Other (specify) [Text field]<br>H. Not in chart | Select all that apply                 | <b>Note: Document any side effects that the patient has experienced at any time since the mifepristone visit. Side effects/symptoms may be documented in provider notes in chart. If no other side effects/symptoms recorded, select “Not in chart”.</b> |
| 42. Serum hCG level                                             | _____ hCG level<br>Test done but level not available in chart<br>Not in chart                                                                              | Select only one                       | Positive, whole numbers                                                                                                                                                                                                                                  |
| 43. a. Urine pregnancy test result                              | Positive<br>Negative<br>Test done but results Not in chart<br>Not in chart                                                                                 | Select only one                       |                                                                                                                                                                                                                                                          |
| b. Sensitivity of test                                          | High<br>Low<br>Not in chart                                                                                                                                | Select only one                       |                                                                                                                                                                                                                                                          |

| Data Element                                             | Response Choices                                                                                                                                                                                                                                                                                                                                                                                            | Select only one/Select all that apply | Data Abstraction Instructions                                                             |
|----------------------------------------------------------|-------------------------------------------------------------------------------------------------------------------------------------------------------------------------------------------------------------------------------------------------------------------------------------------------------------------------------------------------------------------------------------------------------------|---------------------------------------|-------------------------------------------------------------------------------------------|
| 44. Other medications ordered, dispensed or administered | A. Acetaminophen<br>B. Advil<br>C. Amoxicillin<br>D. Azithromycin<br>E. Diazepam<br>F. Doxycycline<br>G. Hydrocodone & Acetaminophen<br>H. Ibuprofen<br>I. Methergine<br>J. Methylergometrine<br>K. MICRhoGam<br>L. Motrin<br>M. Ondansetron<br>N. Phenergan<br>O. Promethazine<br>P. Tylenol<br>Q. Valium<br>R. Vicodin<br>S. Zithromax<br>T. Zofran<br>U. Other (specify) [Text field]<br>V. Not in chart | Select all that apply                 | <b>Note: Include pain meds, antibiotics and other meds. Do not include contraception.</b> |
| 45. General notes about Misoprostol Visit                | [Text field]                                                                                                                                                                                                                                                                                                                                                                                                |                                       |                                                                                           |

| Data Element                                                                                                                                   | Response Choices                                                                                                                         | Select only one/Select all that apply | Data Abstraction Instructions                                                                                                                                                                                                                               |
|------------------------------------------------------------------------------------------------------------------------------------------------|------------------------------------------------------------------------------------------------------------------------------------------|---------------------------------------|-------------------------------------------------------------------------------------------------------------------------------------------------------------------------------------------------------------------------------------------------------------|
| <b>Follow Up Visit</b>                                                                                                                         |                                                                                                                                          |                                       |                                                                                                                                                                                                                                                             |
| 46. Total number of follow up visits to complete abortion care                                                                                 | Numeric field                                                                                                                            |                                       | Positive, whole numbers 0-10.<br><br><b>Important:</b> Please document the number of follow up visits needed to complete abortion care. Do not include follow up visits for other reasons (i.e. treatment for positive STI test, contraceptive visit, etc.) |
| 47. Date of follow up visit                                                                                                                    | MM/DD/YYYY<br>Not in chart                                                                                                               | Select only one                       | Format for date                                                                                                                                                                                                                                             |
| 48. Ultrasound performed at this visit?                                                                                                        | Yes<br>No<br>Not in chart                                                                                                                | Select only one                       | If “No” or “Not in chart”, skip to 49.                                                                                                                                                                                                                      |
| a. Pregnancy sac seen?                                                                                                                         | No sac seen<br>Sac seen – unknown viability<br>Sac seen – viable pregnancy<br>Sac seen – not viable<br>Possible sac seen<br>Not in chart | Select only one                       | If “No sac seen” or “Not in chart”, skip to 48e.                                                                                                                                                                                                            |
| b. If sac seen: Any notes about a change in the sac over time? Is it persistent or has it grown over time? (Please be as detailed as possible) | [Text field]<br>Not in chart                                                                                                             | Select only one                       | <b>Note:</b> Please transcribe word-for-word any notes made about changes in how the pregnancy sac looks. Please be as detailed as possible.                                                                                                                |

| Data Element                                                                 | Response Choices                                                              | Select only one/Select all that apply | Data Abstraction Instructions  |
|------------------------------------------------------------------------------|-------------------------------------------------------------------------------|---------------------------------------|--------------------------------|
| c. Embryo seen?                                                              | Yes<br>No<br>Not in chart                                                     | Select only one                       |                                |
| d. Heartbeat seen?                                                           | Yes<br>No<br>Not in chart                                                     | Select only one                       |                                |
| e. Notes about amount of material in endometrial cavity with clots or tissue | [Text field]<br>Not in chart                                                  | Select only one                       |                                |
| f. Notes on ultrasound findings                                              | [Text field]<br>Not in chart                                                  | Select only one                       |                                |
| 49. Serum hCG level                                                          | _____ hCG level<br>Test done but level not available in chart<br>Not in chart | Select only one                       | Positive, whole numbers        |
| 50. a. Urine pregnancy test result                                           | Positive<br>Negative<br>Test done but results not in chart<br>Not in chart    | Select only one                       | If "Not in chart", skip to 51. |
| b. Sensitivity of test                                                       | High<br>Low<br>Not in chart                                                   | Select only one                       |                                |

| Data Element                                                                          | Response Choices                                                                                                                              | Select only one/Select all that apply | Data Abstraction Instructions                                                                                                                                                                                                                                                                                                              |
|---------------------------------------------------------------------------------------|-----------------------------------------------------------------------------------------------------------------------------------------------|---------------------------------------|--------------------------------------------------------------------------------------------------------------------------------------------------------------------------------------------------------------------------------------------------------------------------------------------------------------------------------------------|
| 51. Current bleeding:                                                                 |                                                                                                                                               |                                       | <p>██████████: complete 51a and, if appropriate, 51b.</p> <p>██████████: complete 51b only.</p>                                                                                                                                                                                                                                            |
| a. Amount of bleeding?                                                                | None<br>Minimal/Light<br>Moderate<br>Heavy<br>Not in chart                                                                                    | Select only one                       | <p><b>Important:</b> Where there is no check box for “None”, mark “Not in chart”.</p> <p>Mark “Minimal” or “Light” depending on terminology used at your site.</p>                                                                                                                                                                         |
| b. Notes on bleeding                                                                  | [Text field]                                                                                                                                  |                                       |                                                                                                                                                                                                                                                                                                                                            |
| 52. Notes on cramping                                                                 | [Text field]                                                                                                                                  |                                       |                                                                                                                                                                                                                                                                                                                                            |
| 53. Other side effects or symptoms experienced since last visit (mark all that apply) | A. Nausea<br>B. Vomiting<br>C. Diarrhea<br>D. Vasovagal response / Fainting<br>E. Fever<br>F. Chills<br>G. Other (specify)<br>H. Not in chart | Select all that apply                 | <p>If G=yes, continue to 53a.</p> <p>For all others, skip to 54.</p> <p><b>Note:</b> Document any side effects that the patient has experienced at any time since the mifepristone visit. Other side effects/symptoms may be documented in provider notes in chart. If no other side effects/symptoms recorded, select “Not in chart”.</p> |
| a. Specify other symptoms                                                             | [Text field]<br>Not in chart                                                                                                                  |                                       |                                                                                                                                                                                                                                                                                                                                            |

| Data Element                                                                                                                                 | Response Choices                                                                                                                                                                                                                                                                                                | Select only one/Select all that apply                          | Data Abstraction Instructions                                                                        |
|----------------------------------------------------------------------------------------------------------------------------------------------|-----------------------------------------------------------------------------------------------------------------------------------------------------------------------------------------------------------------------------------------------------------------------------------------------------------------|----------------------------------------------------------------|------------------------------------------------------------------------------------------------------|
| 54. Any notes recorded about how and when the pregnancy was passed? (i.e. In the car on the way home, how long after the miso it was passed) | [Text field]<br>Not in chart                                                                                                                                                                                                                                                                                    | Select only one                                                | <b>Note: Please transcribe word-for-word</b>                                                         |
| 55. Diagnosis at follow up visit                                                                                                             | Mark all that apply:<br>A. Complete abortion<br>B. Possible incomplete Abortion<br>C. Incomplete Abortion<br>D. Continuing Pregnancy<br>E. Acute Hemorrhage<br>F. Infection<br>G. Other or Undetermined (please explain) [Text field]<br>H. No Diagnosis Given (please explain) [Text field]<br>I. Not in chart | Select all that apply<br><br>[cannot mark I if A-H are marked] | If G and/or H = yes, continue to 55a.<br><br>If D=yes skip to 56.<br><br>For all others, skip to 57. |
| If continuing pregnancy detected:                                                                                                            |                                                                                                                                                                                                                                                                                                                 |                                                                | Complete only if 55D = yes                                                                           |
| 56. Continuing pregnancy detected by ultrasound?                                                                                             | Yes<br>No<br>Not in chart                                                                                                                                                                                                                                                                                       | Select only one                                                | Complete only if 55D = yes                                                                           |
| a. Continuing                                                                                                                                | Yes                                                                                                                                                                                                                                                                                                             | Select only one                                                | Complete only if 55D = yes                                                                           |

| Data Element                                                         | Response Choices                                                                                                                                                                               | Select only one/Select all that apply | Data Abstraction Instructions                                                                                                                                            |
|----------------------------------------------------------------------|------------------------------------------------------------------------------------------------------------------------------------------------------------------------------------------------|---------------------------------------|--------------------------------------------------------------------------------------------------------------------------------------------------------------------------|
| pregnancy confirmed by serum hCG level?                              | No<br>Not in chart                                                                                                                                                                             |                                       |                                                                                                                                                                          |
| 57. Is there any indication that the patient requested intervention? | Yes<br>No<br>Not in chart                                                                                                                                                                      | Select only one                       |                                                                                                                                                                          |
| 58. Intervention provided at this visit?                             | Yes<br>No<br>Not in chart                                                                                                                                                                      | Select only one                       | If "No" or "Not in chart" skip to 59.                                                                                                                                    |
| a. Please explain what intervention was provided                     | [Text field]                                                                                                                                                                                   |                                       | <b>Note: Provide a summary of all intervention provided at this visit, including medications dispensed, ordered, or administered. Please be as detailed as possible.</b> |
| 59.<br>a. Treatment at this visit at the abortion facility           | A. Repeat misoprostol<br>B. Aspiration<br>C. Repeat mife+miso<br>D. Blood transfusion<br>E. Hospital transfer<br>F. Medication<br>G. Other treatment (Specify) [Text field]<br>H. Not in chart | Select all that apply                 | If F=yes, continue to 59b<br><br>For all others, skip to 60                                                                                                              |
| b. Specify medication                                                | A. Acetaminophen<br>B. Advil<br>C. Amoxicillin<br>D. Azithromycin<br>E. Diazepam                                                                                                               | Select all that apply                 | <b>Note: Include pain meds, antibiotics and other meds. Do not include contraception. Doses not needed.</b>                                                              |

| Data Element                                | Response Choices                                                                                                                                                                                                                                                                                              | Select only one/Select all that apply | Data Abstraction Instructions                                                                                |
|---------------------------------------------|---------------------------------------------------------------------------------------------------------------------------------------------------------------------------------------------------------------------------------------------------------------------------------------------------------------|---------------------------------------|--------------------------------------------------------------------------------------------------------------|
|                                             | F. Doxycycline<br>G. Hydrocodone & Acetaminophen<br>H. Ibuprofen<br>I. Methergine<br>J. Methylergometrine<br>K. MICRhoGam<br>L. Motrin<br>M. Ondansetron<br>N. Phenergan<br>O. Promethazine<br>P. Tylenol<br>Q. Valium<br>R. Vicodin<br>S. Zithromax<br>T. Zofran<br>U. Other [Text field]<br>V. Not in chart |                                       |                                                                                                              |
| 60. a. Patient treated at another facility? | A. Yes, Urgent Care<br>B. Yes, Emergency Department<br>C. Yes, Hospital<br>D. No<br>E. Not in Chart                                                                                                                                                                                                           | Check all that apply                  | If “No” or “Not in Chart” skip to 61<br><br>Note: If A, B, or C=yes, then cannot mark D or E and vice versa. |
| b. Treatment at urgent care/ED/hospital     | A. Repeat misoprostol<br>B. Aspiration<br>C. Repeat mife+miso<br>D. Blood transfusion<br>E. Hospitalization (admission)<br>F. Medication (Specify)<br>G. IV fluids                                                                                                                                            | Select all that apply                 | If F = yes, skip to 60c.<br><br>For all others, skip to 61d                                                  |



| Data Element                         | Response Choices                                                                                                                                                                                                                                                                                                                                                                                  | Select only one/Select all that apply | Data Abstraction Instructions                                                             |
|--------------------------------------|---------------------------------------------------------------------------------------------------------------------------------------------------------------------------------------------------------------------------------------------------------------------------------------------------------------------------------------------------------------------------------------------------|---------------------------------------|-------------------------------------------------------------------------------------------|
|                                      | H. No treatment, observation only<br>Other treatment (Specify) [Text field]<br>I. Not in chart                                                                                                                                                                                                                                                                                                    |                                       |                                                                                           |
| c. Specify medication                | A. Acetaminophen<br>B. Advil<br>C. Amoxicillin<br>D. Azithromycin<br>E. Diazepam<br>F. Doxycycline<br>G. Hydrocodone & Acetaminophen<br>H. Ibuprofen<br>I. Methergine<br>J. Methylergometrine<br>K. MICRhoGam<br>L. Motrin<br>M. Ondansetron<br>N. Phenergan<br>O. Promethazine<br>P. Tylenol<br>Q. Valium<br>R. Vicodin<br>S. Zithromax<br>T. Zofran<br>U. Other [Text field]<br>V. Not in chart |                                       | <b>Note: Include pain meds, antibiotics and other meds. Do not include contraception.</b> |
| d. Notes treatment at other facility | [Text field]                                                                                                                                                                                                                                                                                                                                                                                      |                                       |                                                                                           |

| Data Element                                       | Response Choices             | Select only one/Select all that apply | Data Abstraction Instructions                                                                                                                                                                                                                                                                       |
|----------------------------------------------------|------------------------------|---------------------------------------|-----------------------------------------------------------------------------------------------------------------------------------------------------------------------------------------------------------------------------------------------------------------------------------------------------|
| 61. General notes about this follow up visit       | [Text field]                 |                                       |                                                                                                                                                                                                                                                                                                     |
| <b>Additional Information / Care</b>               |                              |                                       |                                                                                                                                                                                                                                                                                                     |
| 62. Additional ultrasounds                         | Yes<br>No<br>Not in chart    | Select only one                       | If “No” or “Not in chart”, skip to 63<br><br><b>Additional ultrasound visits may take place that are unrelated to the medication abortion (i.e. ruling out ectopic pregnancy, ultrasound related to fetal heartbeat law). Note all additional ultrasounds and associated dates.</b>                 |
| a. Date of additional ultrasound(s)                | MM/DD/YYYY<br>Not in chart   | Select only one                       | Format for date<br><br>Allow for entering of up to 10 dates                                                                                                                                                                                                                                         |
| b. Notes about additional ultrasound               | [Text field]<br>Not in chart |                                       | Repeat for each additional date                                                                                                                                                                                                                                                                     |
| 63. Medical Board RU-486 Report, “Remarks” Section | [Text field]                 |                                       | <b>Note: A copy of the Medical Board RU-486 Report should be in every chart in which additional intervention or complication occurred. Please transcribe “Remarks” word-for-word.</b>                                                                                                               |
| 64. Care sought at outside provider?               | Yes<br>No<br>Not in chart    | Select only one                       | If “No” or “Not in chart”, skip to 65<br><br><b>If care was sought/received at any outside provider(s) during the course of the abortion (emergency room, urgent care, family doctor, etc.), please record associated date(s) and notes about where care was sought and any treatment provided.</b> |

| Data Element                                   | Response Choices             | Select only one/Select all that apply | Data Abstraction Instructions                                                                                      |
|------------------------------------------------|------------------------------|---------------------------------------|--------------------------------------------------------------------------------------------------------------------|
| a. Date(s)                                     | MM/DD/YYYY<br>Not in chart   | Select only one                       | Format for date<br><br>Allow for entering of up to 10 dates<br>Repeat for each additional date                     |
| b. Notes about care sought at outside provider | [Text field]<br>Not in chart |                                       | <b>Document where the patient went and how she was treated.</b>                                                    |
| 65. Calls to after-hours line?                 | Yes<br>No<br>Not in chart    | Select only one                       | If “No” or “Not in chart”, skip to 66<br><br><b>Document all calls to after-hours line and associated date(s).</b> |
| a. Dates                                       | MM/DD/YYYY<br>Not in chart   | Select only one                       | Format for date<br><br>Allow for entering of up to 10 dates<br>Repeat for each additional date                     |
| b. Notes about afterhours calls                | [Text field]<br>Not in chart | Select only one                       | <b>Provide summary or transcribe call notes word-for word.</b>                                                     |
| 66. Relevant test results (blood)              | [Text field]                 |                                       | <b>Document the results of any additional, relevant blood tests.</b>                                               |
| 67. General Notes                              | [Text field]                 |                                       | <b>Record any additional notes about the abortion and/or chart that do not fit anywhere else in this form.</b>     |

## Appendix B: FDA vs. Evidence-Based Protocol for Medication Abortion

|                                                | FDA regimen                    | Updated regimen:<br>Vaginal Misoprostol | Updated regimen:<br>Buccal Misoprostol |
|------------------------------------------------|--------------------------------|-----------------------------------------|----------------------------------------|
| <b>Maximum gestational age</b>                 | 49 days from LMP               | 63 days from LMP                        | 63 days from LMP                       |
| <b>Mifepristone dose</b>                       | 600 mg. orally in office       | 200 mg. orally in office                | 200 mg. orally in office               |
| <b>Misoprostol dose</b>                        | 400 mcg orally<br>(2 tablets)  | 800mcg. vaginally<br>(4 tablets)        | 800 mcg. buccally<br>(4 tablets)       |
| <b>Misoprostol timing</b>                      | 48 hours after<br>mifepristone | 6-72 hours after<br>mifepristone        | 24-36 hours after mifepristone         |
| <b>Misoprostol location</b>                    | Clinician's office             | Home                                    | Home                                   |
| <b>Follow-up visit</b>                         | 14 days after<br>mifepristone  | 7-14 days after<br>mifepristone         | 7-14 days after mifepristone           |
| <b>Minimum number of office visits in Ohio</b> | 4                              | 3                                       | 3                                      |

Source: National Abortion Federation

## Appendix C: Visit Flowcharts

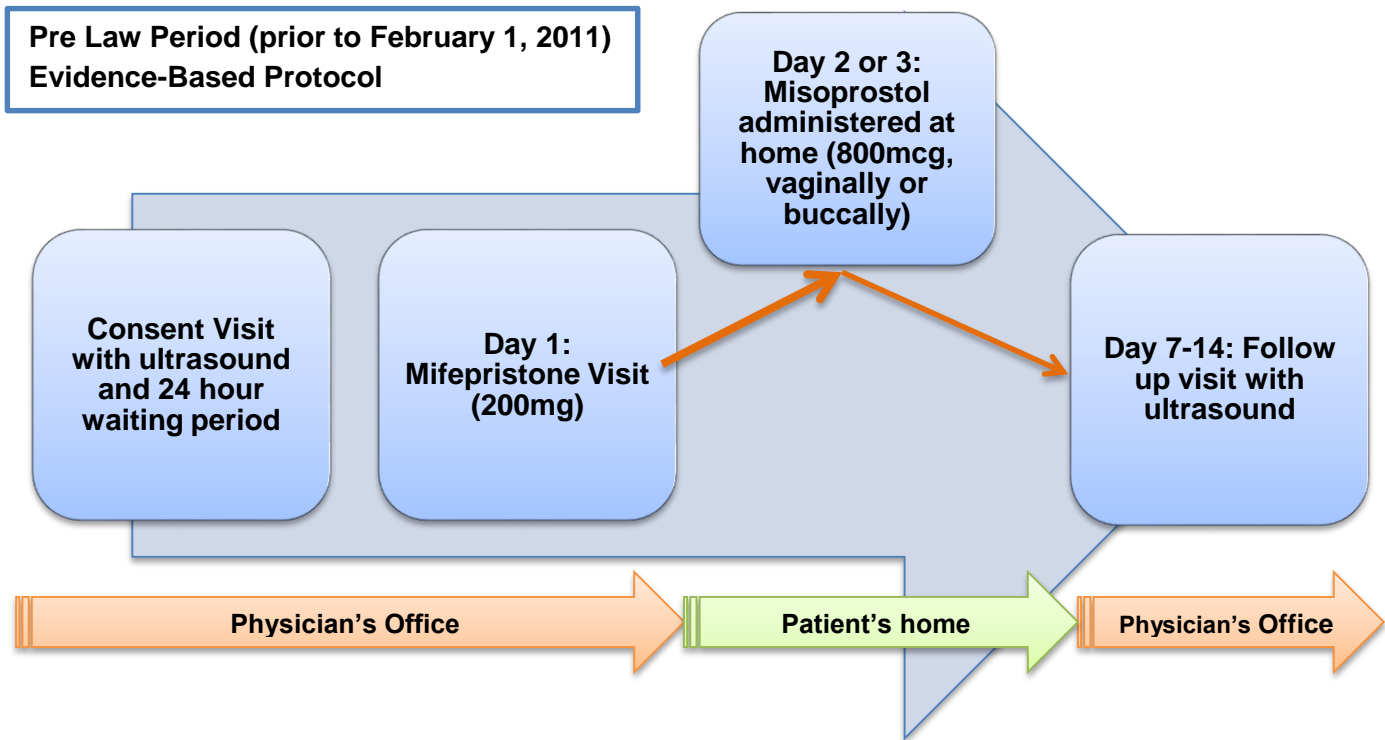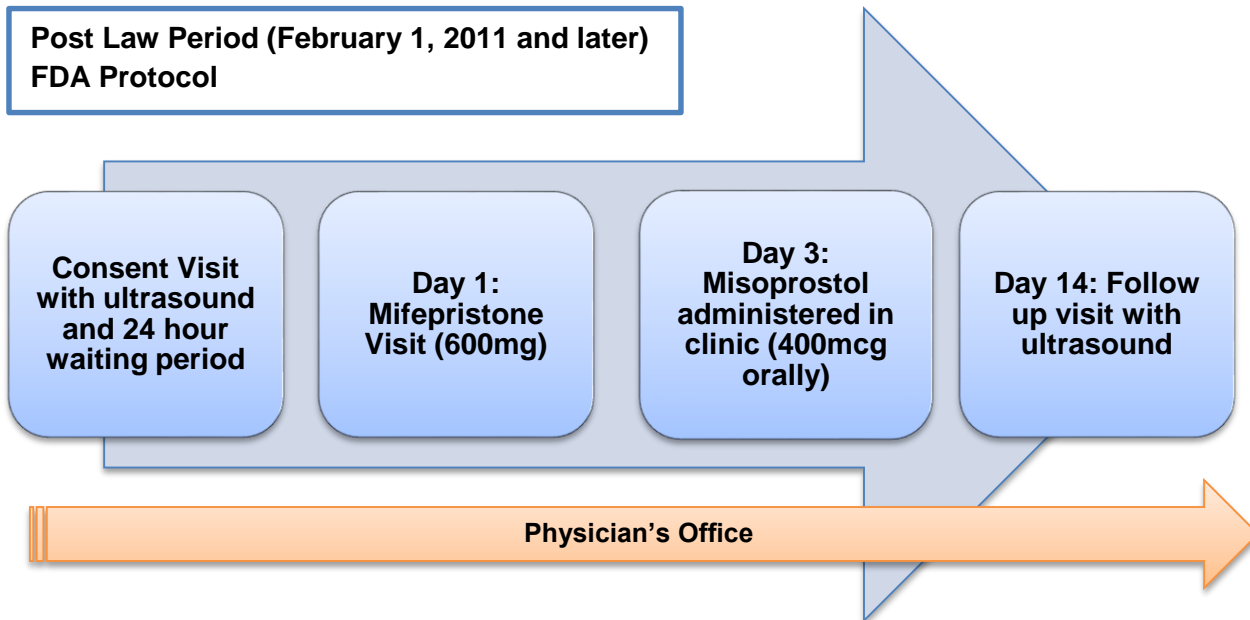

## Appendix D: Data Review Documentation Form

Please use this form to document data review of charts marked with a black dot.

| Record ID | Error(s)<br>NO | Error(s)<br>YES | Data Field           | Incorrect<br>Entry(ies) | Corrections Made | Initials |
|-----------|----------------|-----------------|----------------------|-------------------------|------------------|----------|
| 05-0001   | X              |                 |                      |                         |                  | SC       |
| 05-0030   |                | X               | <i>Date of birth</i> | 5/20/1980               | 5/20/1989        | SC       |
| 05-0031   | X              |                 |                      |                         |                  | SC       |
| 05-0032   | X              |                 |                      |                         |                  | SC       |
|           |                |                 |                      |                         |                  |          |
|           |                |                 |                      |                         |                  |          |
|           |                |                 |                      |                         |                  |          |
|           |                |                 |                      |                         |                  |          |
|           |                |                 |                      |                         |                  |          |
|           |                |                 |                      |                         |                  |          |
|           |                |                 |                      |                         |                  |          |
|           |                |                 |                      |                         |                  |          |
|           |                |                 |                      |                         |                  |          |
|           |                |                 |                      |                         |                  |          |
|           |                |                 |                      |                         |                  |          |
|           |                |                 |                      |                         |                  |          |
|           |                |                 |                      |                         |                  |          |
|           |                |                 |                      |                         |                  |          |
|           |                |                 |                      |                         |                  |          |
|           |                |                 |                      |                         |                  |          |
|           |                |                 |                      |                         |                  |          |
|           |                |                 |                      |                         |                  |          |
|           |                |                 |                      |                         |                  |          |

| Record ID | Error(s)<br>NO | Error(s)<br>YES | Data Field | Incorrect<br>Entry(ies) | Corrections Made | Initials |
|-----------|----------------|-----------------|------------|-------------------------|------------------|----------|
|           |                |                 |            |                         |                  |          |
|           |                |                 |            |                         |                  |          |
|           |                |                 |            |                         |                  |          |
|           |                |                 |            |                         |                  |          |
|           |                |                 |            |                         |                  |          |
|           |                |                 |            |                         |                  |          |
|           |                |                 |            |                         |                  |          |
|           |                |                 |            |                         |                  |          |
|           |                |                 |            |                         |                  |          |
|           |                |                 |            |                         |                  |          |
|           |                |                 |            |                         |                  |          |
|           |                |                 |            |                         |                  |          |
|           |                |                 |            |                         |                  |          |
|           |                |                 |            |                         |                  |          |
|           |                |                 |            |                         |                  |          |
|           |                |                 |            |                         |                  |          |
|           |                |                 |            |                         |                  |          |
|           |                |                 |            |                         |                  |          |
|           |                |                 |            |                         |                  |          |
|           |                |                 |            |                         |                  |          |
|           |                |                 |            |                         |                  |          |
|           |                |                 |            |                         |                  |          |
|           |                |                 |            |                         |                  |          |
|           |                |                 |            |                         |                  |          |
|           |                |                 |            |                         |                  |          |

| Record ID | Error(s)<br>NO | Error(s)<br>YES | Data Field | Incorrect<br>Entry(ies) | Corrections Made | Initials |
|-----------|----------------|-----------------|------------|-------------------------|------------------|----------|
|           |                |                 |            |                         |                  |          |
|           |                |                 |            |                         |                  |          |
|           |                |                 |            |                         |                  |          |
|           |                |                 |            |                         |                  |          |
|           |                |                 |            |                         |                  |          |
|           |                |                 |            |                         |                  |          |
|           |                |                 |            |                         |                  |          |
|           |                |                 |            |                         |                  |          |
|           |                |                 |            |                         |                  |          |
|           |                |                 |            |                         |                  |          |
|           |                |                 |            |                         |                  |          |
|           |                |                 |            |                         |                  |          |
|           |                |                 |            |                         |                  |          |
|           |                |                 |            |                         |                  |          |
|           |                |                 |            |                         |                  |          |
|           |                |                 |            |                         |                  |          |
|           |                |                 |            |                         |                  |          |
|           |                |                 |            |                         |                  |          |
|           |                |                 |            |                         |                  |          |
|           |                |                 |            |                         |                  |          |
|           |                |                 |            |                         |                  |          |
|           |                |                 |            |                         |                  |          |



| Record ID | Error(s)<br>NO | Error(s)<br>YES | Data Field | Incorrect<br>Entry(ies) | Corrections Made | Initials |
|-----------|----------------|-----------------|------------|-------------------------|------------------|----------|
|           |                |                 |            |                         |                  |          |
|           |                |                 |            |                         |                  |          |
|           |                |                 |            |                         |                  |          |
|           |                |                 |            |                         |                  |          |
|           |                |                 |            |                         |                  |          |
|           |                |                 |            |                         |                  |          |
|           |                |                 |            |                         |                  |          |
|           |                |                 |            |                         |                  |          |
|           |                |                 |            |                         |                  |          |
|           |                |                 |            |                         |                  |          |
|           |                |                 |            |                         |                  |          |
|           |                |                 |            |                         |                  |          |
|           |                |                 |            |                         |                  |          |
|           |                |                 |            |                         |                  |          |
|           |                |                 |            |                         |                  |          |
|           |                |                 |            |                         |                  |          |
|           |                |                 |            |                         |                  |          |
|           |                |                 |            |                         |                  |          |
|           |                |                 |            |                         |                  |          |
|           |                |                 |            |                         |                  |          |

| Record ID | Error(s)<br>NO | Error(s)<br>YES | Data Field | Incorrect<br>Entry(ies) | Corrections Made | Initials |
|-----------|----------------|-----------------|------------|-------------------------|------------------|----------|
|           |                |                 |            |                         |                  |          |
|           |                |                 |            |                         |                  |          |
|           |                |                 |            |                         |                  |          |
|           |                |                 |            |                         |                  |          |
|           |                |                 |            |                         |                  |          |
|           |                |                 |            |                         |                  |          |
|           |                |                 |            |                         |                  |          |
|           |                |                 |            |                         |                  |          |
|           |                |                 |            |                         |                  |          |
|           |                |                 |            |                         |                  |          |
|           |                |                 |            |                         |                  |          |
|           |                |                 |            |                         |                  |          |
|           |                |                 |            |                         |                  |          |
|           |                |                 |            |                         |                  |          |
|           |                |                 |            |                         |                  |          |
|           |                |                 |            |                         |                  |          |
|           |                |                 |            |                         |                  |          |
|           |                |                 |            |                         |                  |          |
|           |                |                 |            |                         |                  |          |
|           |                |                 |            |                         |                  |          |
|           |                |                 |            |                         |                  |          |
|           |                |                 |            |                         |                  |          |

| Record ID | Error(s)<br>NO | Error(s)<br>YES | Data Field | Incorrect<br>Entry(ies) | Corrections Made | Initials |
|-----------|----------------|-----------------|------------|-------------------------|------------------|----------|
|           |                |                 |            |                         |                  |          |
|           |                |                 |            |                         |                  |          |
|           |                |                 |            |                         |                  |          |
|           |                |                 |            |                         |                  |          |
|           |                |                 |            |                         |                  |          |
|           |                |                 |            |                         |                  |          |
|           |                |                 |            |                         |                  |          |
|           |                |                 |            |                         |                  |          |
|           |                |                 |            |                         |                  |          |
|           |                |                 |            |                         |                  |          |
|           |                |                 |            |                         |                  |          |
|           |                |                 |            |                         |                  |          |
|           |                |                 |            |                         |                  |          |
|           |                |                 |            |                         |                  |          |
|           |                |                 |            |                         |                  |          |
|           |                |                 |            |                         |                  |          |
|           |                |                 |            |                         |                  |          |
|           |                |                 |            |                         |                  |          |
|           |                |                 |            |                         |                  |          |
|           |                |                 |            |                         |                  |          |
|           |                |                 |            |                         |                  |          |
|           |                |                 |            |                         |                  |          |
|           |                |                 |            |                         |                  |          |
|           |                |                 |            |                         |                  |          |
|           |                |                 |            |                         |                  |          |

| <b>Record ID</b> | <b>Error(s)<br/>NO</b> | <b>Error(s)<br/>YES</b> | <b>Data Field</b> | <b>Incorrect<br/>Entry(ies)</b> | <b>Corrections Made</b> | <b>Initials</b> |
|------------------|------------------------|-------------------------|-------------------|---------------------------------|-------------------------|-----------------|
|                  |                        |                         |                   |                                 |                         |                 |
|                  |                        |                         |                   |                                 |                         |                 |
|                  |                        |                         |                   |                                 |                         |                 |
|                  |                        |                         |                   |                                 |                         |                 |
|                  |                        |                         |                   |                                 |                         |                 |
|                  |                        |                         |                   |                                 |                         |                 |
|                  |                        |                         |                   |                                 |                         |                 |
|                  |                        |                         |                   |                                 |                         |                 |
|                  |                        |                         |                   |                                 |                         |                 |
|                  |                        |                         |                   |                                 |                         |                 |
|                  |                        |                         |                   |                                 |                         |                 |
|                  |                        |                         |                   |                                 |                         |                 |
|                  |                        |                         |                   |                                 |                         |                 |
|                  |                        |                         |                   |                                 |                         |                 |
|                  |                        |                         |                   |                                 |                         |                 |
|                  |                        |                         |                   |                                 |                         |                 |
|                  |                        |                         |                   |                                 |                         |                 |
|                  |                        |                         |                   |                                 |                         |                 |
|                  |                        |                         |                   |                                 |                         |                 |
|                  |                        |                         |                   |                                 |                         |                 |

| <b>Record ID</b> | <b>Error(s)<br/>NO</b> | <b>Error(s)<br/>YES</b> | <b>Data Field</b> | <b>Incorrect<br/>Entry(ies)</b> | <b>Corrections Made</b> | <b>Initials</b> |
|------------------|------------------------|-------------------------|-------------------|---------------------------------|-------------------------|-----------------|
|                  |                        |                         |                   |                                 |                         |                 |
|                  |                        |                         |                   |                                 |                         |                 |
|                  |                        |                         |                   |                                 |                         |                 |
|                  |                        |                         |                   |                                 |                         |                 |
|                  |                        |                         |                   |                                 |                         |                 |
|                  |                        |                         |                   |                                 |                         |                 |
|                  |                        |                         |                   |                                 |                         |                 |
|                  |                        |                         |                   |                                 |                         |                 |
|                  |                        |                         |                   |                                 |                         |                 |
|                  |                        |                         |                   |                                 |                         |                 |
|                  |                        |                         |                   |                                 |                         |                 |
|                  |                        |                         |                   |                                 |                         |                 |
|                  |                        |                         |                   |                                 |                         |                 |
|                  |                        |                         |                   |                                 |                         |                 |
|                  |                        |                         |                   |                                 |                         |                 |
|                  |                        |                         |                   |                                 |                         |                 |
|                  |                        |                         |                   |                                 |                         |                 |
|                  |                        |                         |                   |                                 |                         |                 |
|                  |                        |                         |                   |                                 |                         |                 |
|                  |                        |                         |                   |                                 |                         |                 |

| <b>Record ID</b> | <b>Error(s)<br/>NO</b> | <b>Error(s)<br/>YES</b> | <b>Data Field</b> | <b>Incorrect<br/>Entry(ies)</b> | <b>Corrections Made</b> | <b>Initials</b> |
|------------------|------------------------|-------------------------|-------------------|---------------------------------|-------------------------|-----------------|
|                  |                        |                         |                   |                                 |                         |                 |
|                  |                        |                         |                   |                                 |                         |                 |
|                  |                        |                         |                   |                                 |                         |                 |
|                  |                        |                         |                   |                                 |                         |                 |
|                  |                        |                         |                   |                                 |                         |                 |
|                  |                        |                         |                   |                                 |                         |                 |
|                  |                        |                         |                   |                                 |                         |                 |
|                  |                        |                         |                   |                                 |                         |                 |
|                  |                        |                         |                   |                                 |                         |                 |
|                  |                        |                         |                   |                                 |                         |                 |
|                  |                        |                         |                   |                                 |                         |                 |
|                  |                        |                         |                   |                                 |                         |                 |
|                  |                        |                         |                   |                                 |                         |                 |
|                  |                        |                         |                   |                                 |                         |                 |
|                  |                        |                         |                   |                                 |                         |                 |
|                  |                        |                         |                   |                                 |                         |                 |
|                  |                        |                         |                   |                                 |                         |                 |
|                  |                        |                         |                   |                                 |                         |                 |
|                  |                        |                         |                   |                                 |                         |                 |
|                  |                        |                         |                   |                                 |                         |                 |
|                  |                        |                         |                   |                                 |                         |                 |
|                  |                        |                         |                   |                                 |                         |                 |
|                  |                        |                         |                   |                                 |                         |                 |
|                  |                        |                         |                   |                                 |                         |                 |
|                  |                        |                         |                   |                                 |                         |                 |
|                  |                        |                         |                   |                                 |                         |                 |
|                  |                        |                         |                   |                                 |                         |                 |
|                  |                        |                         |                   |                                 |                         |                 |
|                  |                        |                         |                   |                                 |                         |                 |
|                  |                        |                         |                   |                                 |                         |                 |
|                  |                        |                         |                   |                                 |                         |                 |
|                  |                        |                         |                   |                                 |                         |                 |
|                  |                        |                         |                   |                                 |                         |                 |
|                  |                        |                         |                   |                                 |                         |                 |
|                  |                        |                         |                   |                                 |                         |                 |

| <b>Record ID</b> | <b>Error(s)<br/>NO</b> | <b>Error(s)<br/>YES</b> | <b>Data Field</b> | <b>Incorrect<br/>Entry(ies)</b> | <b>Corrections Made</b> | <b>Initials</b> |
|------------------|------------------------|-------------------------|-------------------|---------------------------------|-------------------------|-----------------|
|                  |                        |                         |                   |                                 |                         |                 |
|                  |                        |                         |                   |                                 |                         |                 |
|                  |                        |                         |                   |                                 |                         |                 |
|                  |                        |                         |                   |                                 |                         |                 |
|                  |                        |                         |                   |                                 |                         |                 |
|                  |                        |                         |                   |                                 |                         |                 |
|                  |                        |                         |                   |                                 |                         |                 |
|                  |                        |                         |                   |                                 |                         |                 |
|                  |                        |                         |                   |                                 |                         |                 |
|                  |                        |                         |                   |                                 |                         |                 |
|                  |                        |                         |                   |                                 |                         |                 |
|                  |                        |                         |                   |                                 |                         |                 |
|                  |                        |                         |                   |                                 |                         |                 |
|                  |                        |                         |                   |                                 |                         |                 |
|                  |                        |                         |                   |                                 |                         |                 |
|                  |                        |                         |                   |                                 |                         |                 |
|                  |                        |                         |                   |                                 |                         |                 |
|                  |                        |                         |                   |                                 |                         |                 |
|                  |                        |                         |                   |                                 |                         |                 |
|                  |                        |                         |                   |                                 |                         |                 |
|                  |                        |                         |                   |                                 |                         |                 |
|                  |                        |                         |                   |                                 |                         |                 |
|                  |                        |                         |                   |                                 |                         |                 |
|                  |                        |                         |                   |                                 |                         |                 |
|                  |                        |                         |                   |                                 |                         |                 |
|                  |                        |                         |                   |                                 |                         |                 |
|                  |                        |                         |                   |                                 |                         |                 |
|                  |                        |                         |                   |                                 |                         |                 |
|                  |                        |                         |                   |                                 |                         |                 |
|                  |                        |                         |                   |                                 |                         |                 |
|                  |                        |                         |                   |                                 |                         |                 |
|                  |                        |                         |                   |                                 |                         |                 |





| Record ID | Error(s)<br>NO | Error(s)<br>YES | Data Field | Incorrect<br>Entry(ies) | Corrections Made | Initials |
|-----------|----------------|-----------------|------------|-------------------------|------------------|----------|
|           |                |                 |            |                         |                  |          |
|           |                |                 |            |                         |                  |          |
|           |                |                 |            |                         |                  |          |
|           |                |                 |            |                         |                  |          |
|           |                |                 |            |                         |                  |          |
|           |                |                 |            |                         |                  |          |
|           |                |                 |            |                         |                  |          |
|           |                |                 |            |                         |                  |          |
|           |                |                 |            |                         |                  |          |
|           |                |                 |            |                         |                  |          |
|           |                |                 |            |                         |                  |          |
|           |                |                 |            |                         |                  |          |
|           |                |                 |            |                         |                  |          |
|           |                |                 |            |                         |                  |          |
|           |                |                 |            |                         |                  |          |
|           |                |                 |            |                         |                  |          |
|           |                |                 |            |                         |                  |          |
|           |                |                 |            |                         |                  |          |
|           |                |                 |            |                         |                  |          |
|           |                |                 |            |                         |                  |          |
|           |                |                 |            |                         |                  |          |
|           |                |                 |            |                         |                  |          |
|           |                |                 |            |                         |                  |          |
|           |                |                 |            |                         |                  |          |
|           |                |                 |            |                         |                  |          |
|           |                |                 |            |                         |                  |          |
|           |                |                 |            |                         |                  |          |



| Record ID | Error(s)<br>NO | Error(s)<br>YES | Data Field | Incorrect<br>Entry(ies) | Corrections Made | Initials |
|-----------|----------------|-----------------|------------|-------------------------|------------------|----------|
|           |                |                 |            |                         |                  |          |
|           |                |                 |            |                         |                  |          |
|           |                |                 |            |                         |                  |          |
|           |                |                 |            |                         |                  |          |
|           |                |                 |            |                         |                  |          |
|           |                |                 |            |                         |                  |          |
|           |                |                 |            |                         |                  |          |
|           |                |                 |            |                         |                  |          |
|           |                |                 |            |                         |                  |          |
|           |                |                 |            |                         |                  |          |
|           |                |                 |            |                         |                  |          |
|           |                |                 |            |                         |                  |          |
|           |                |                 |            |                         |                  |          |
|           |                |                 |            |                         |                  |          |
|           |                |                 |            |                         |                  |          |
|           |                |                 |            |                         |                  |          |
|           |                |                 |            |                         |                  |          |
|           |                |                 |            |                         |                  |          |
|           |                |                 |            |                         |                  |          |
|           |                |                 |            |                         |                  |          |
|           |                |                 |            |                         |                  |          |
|           |                |                 |            |                         |                  |          |
|           |                |                 |            |                         |                  |          |
|           |                |                 |            |                         |                  |          |
|           |                |                 |            |                         |                  |          |

| Record ID | Error(s)<br>NO | Error(s)<br>YES | Data Field | Incorrect<br>Entry(ies) | Corrections Made | Initials |
|-----------|----------------|-----------------|------------|-------------------------|------------------|----------|
|           |                |                 |            |                         |                  |          |
|           |                |                 |            |                         |                  |          |
|           |                |                 |            |                         |                  |          |
|           |                |                 |            |                         |                  |          |
|           |                |                 |            |                         |                  |          |
|           |                |                 |            |                         |                  |          |
|           |                |                 |            |                         |                  |          |
|           |                |                 |            |                         |                  |          |
|           |                |                 |            |                         |                  |          |
|           |                |                 |            |                         |                  |          |
|           |                |                 |            |                         |                  |          |
|           |                |                 |            |                         |                  |          |
|           |                |                 |            |                         |                  |          |
|           |                |                 |            |                         |                  |          |
|           |                |                 |            |                         |                  |          |
|           |                |                 |            |                         |                  |          |
|           |                |                 |            |                         |                  |          |
|           |                |                 |            |                         |                  |          |
|           |                |                 |            |                         |                  |          |
|           |                |                 |            |                         |                  |          |
|           |                |                 |            |                         |                  |          |
|           |                |                 |            |                         |                  |          |

| Record ID | Error(s)<br>NO | Error(s)<br>YES | Data Field | Incorrect Entry(ies) | Corrections Made | Initials |
|-----------|----------------|-----------------|------------|----------------------|------------------|----------|
|           |                |                 |            |                      |                  |          |
|           |                |                 |            |                      |                  |          |
|           |                |                 |            |                      |                  |          |
|           |                |                 |            |                      |                  |          |
|           |                |                 |            |                      |                  |          |
|           |                |                 |            |                      |                  |          |
|           |                |                 |            |                      |                  |          |
|           |                |                 |            |                      |                  |          |
|           |                |                 |            |                      |                  |          |
|           |                |                 |            |                      |                  |          |
|           |                |                 |            |                      |                  |          |
|           |                |                 |            |                      |                  |          |
|           |                |                 |            |                      |                  |          |
|           |                |                 |            |                      |                  |          |
|           |                |                 |            |                      |                  |          |
|           |                |                 |            |                      |                  |          |
|           |                |                 |            |                      |                  |          |
|           |                |                 |            |                      |                  |          |
|           |                |                 |            |                      |                  |          |
|           |                |                 |            |                      |                  |          |
|           |                |                 |            |                      |                  |          |
